# Supplementary material
Source: publisher site journal article supplement (https://oncotarget.com/article/28287)
Supplement: Supplementary file 1 [file 28287]

## Addendum

**Addendum: Placental immune editing switch (PIES): learning about immunomodulatory pathways from a unique case report****Miguel H. Bronchud<sup>1</sup>, Francesc Tresserra<sup>2</sup>, Wenjie Xu<sup>3</sup>, Sarah Warren<sup>3</sup>, Maite Cusido<sup>4</sup>, Bernat Zantop<sup>5</sup>, Ana Claudia Zenclussen<sup>6</sup> and Alessandra Cesano<sup>3</sup>**<sup>1</sup>Institut Bellmunt Oncologia, Hospital Universitario Dexeus. Grupo Quirón Salud, Barcelona, Spain<sup>2</sup>Servei Anatomia Patològica, Hospital Universitario Dexeus. Grupo Quirón Salud, Barcelona, Spain<sup>3</sup>Nanostring Technologies, Immune Oncology, Seattle, WA, USA<sup>4</sup>Ginecologia Oncològica, Hospital Universitario Dexeus. Grupo Quirón Salud, Barcelona, Spain<sup>5</sup>Servei Obstetrícia i Neonatologia, Hospital Universitario Dexeus. Grupo Quirón Salud, Barcelona, Spain<sup>6</sup>Experimental Obstetrics and Gynecology, Medical Faculty, Otto-von-Guericke University Magdeburg, Magdeburg, Germany**Published:****Copyright:** © 2022 Bronchud et al. This is an open access article distributed under the terms of the [Creative Commons Attribution License](#) (CC BY 3.0), which permits unrestricted use, distribution, and reproduction in any medium, provided the original author and source are credited.**Consent was added to this article:** The human tissues used for this case report were obtained with the patient's full consent.Original article: Oncotarget. 2016; 7:83817–83827. <https://doi.org/10.18632/oncotarget.13306>
